# Supplementary material for: Comparative analysis of the microRNA transcriptome between yak and cattle provides insight into high-altitude adaptation
Source: PeerJ. 2017 Nov 2;5:e3959. doi: 10.7717/peerj.3959 (PMC5671665; doi:10.7717/peerj.3959)

A

## Mature miRNA

Yak genome

Cattle genome

32

752

55

B

Spearman's correlation coefficient

0.80 0.94 0.97

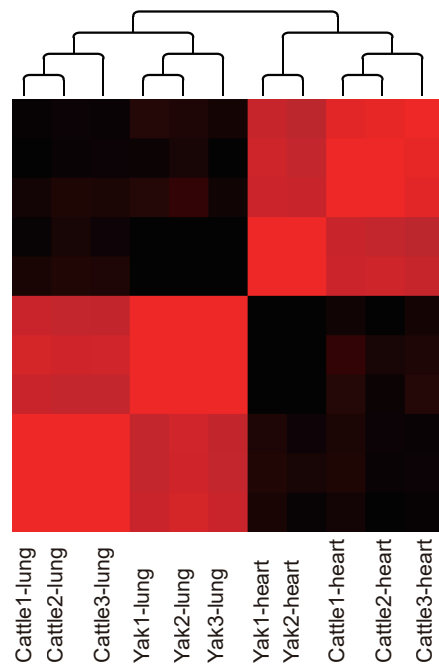

C

Spearman's correlation coefficient

0.80 0.94 0.99

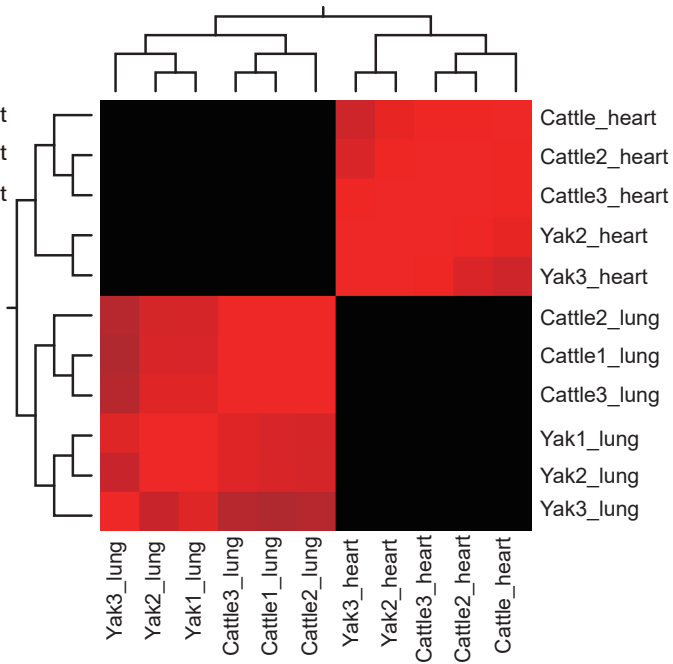

Supplement: Figure S1 — (A) Comparable amount of miRNAs were identified using yak or bovine genome. (B–C) Hierarchical clustering and heat map matrix of pairwise Spearman’s correlations of the counts of bovine genome-annotated miRNAs (B) or yak genome-annotated miRNAs (C) between 11 miRNA libraries. [file peerj-05-3959-s001.pdf]
