# Supplementary material for: Comparative analysis of the microRNA transcriptome between yak and cattle provides insight into high-altitude adaptation
Source: PeerJ journal article supplement (doi:10.7717/peerj.3959), 2017-11-02

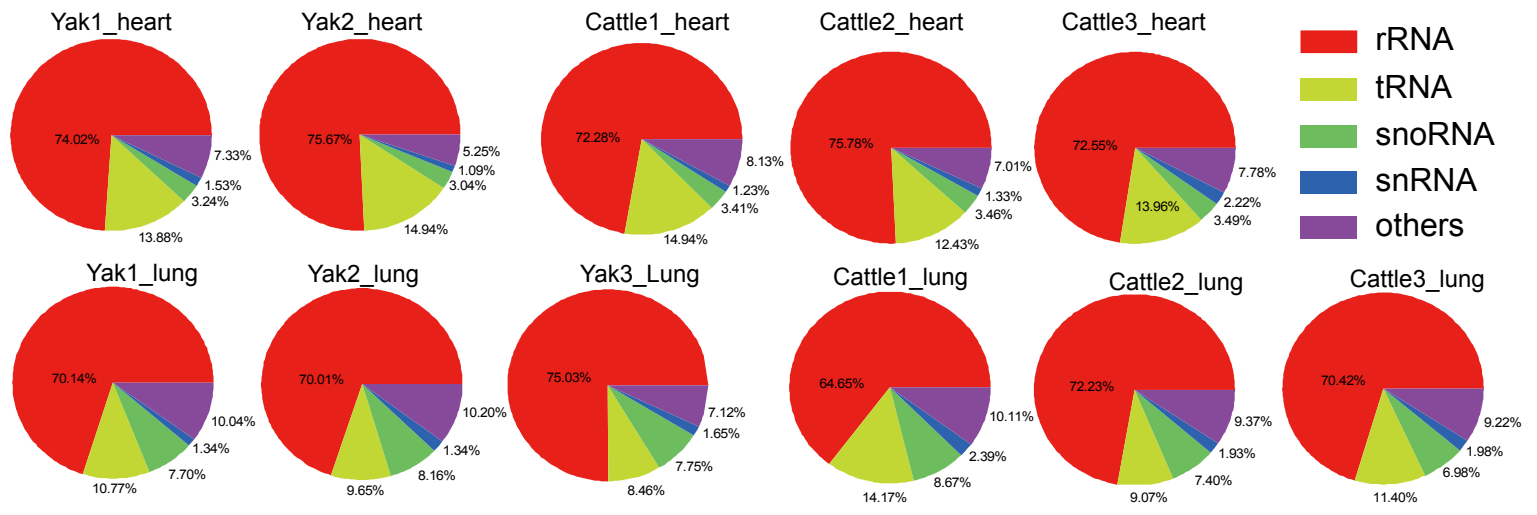

Supplement: Guan_et_al._FigureS2.pdf [file Guan_et_al._FigureS2.pdf]
