# Supplementary material for: Comparative analysis of the microRNA transcriptome between yak and cattle provides insight into high-altitude adaptation
Source: PubMed Central journal article supplement (PMC5671665; doi:10.7717/peerj.3959), 2017-11-02

A

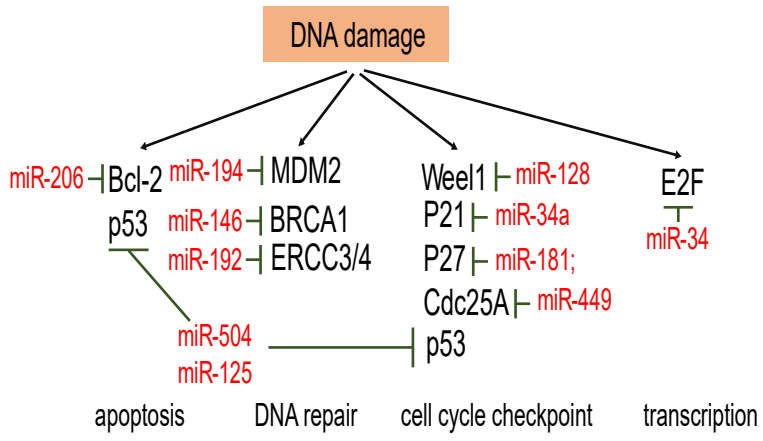

B

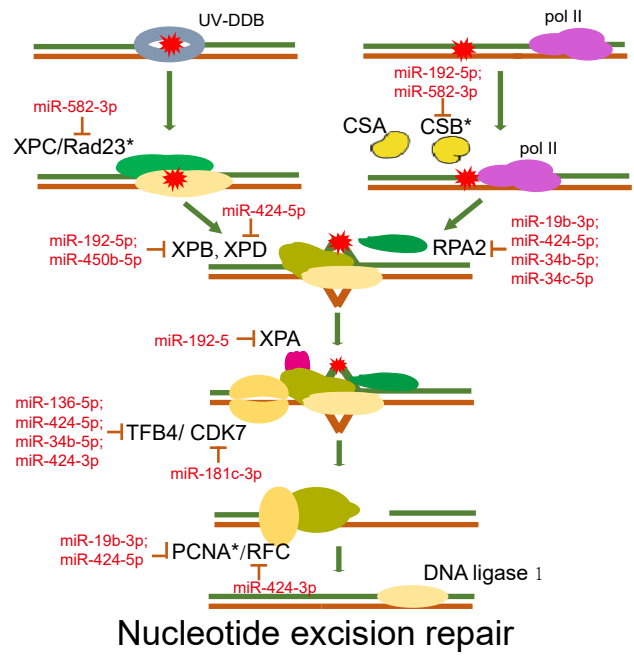

Supplement: peerj-05-3959-s005.pdf [file peerj-05-3959-s005.pdf]
