# Supplementary material for: Comparative analysis of the microRNA transcriptome between yak and cattle provides insight into high-altitude adaptation
Source: PeerJ. 2017 Nov 2;5:e3959. doi: 10.7717/peerj.3959 (PMC5671665; doi:10.7717/peerj.3959)
Supplement: Table S1 [file peerj-05-3959-s006.xlsx]

## Sheet: Table S1
Table S1. Overview of small RNA sequencing data
(1). For "# counts" and “# kinds” , there is overlapping in mapping of sequ-seqs with mRNA, rRNA, tRNA, snRNA, snoRNA and repeats. (2).“High quality reads” includes all unclassified sequences including known and undiscovered miRNAs.
By counts of sequences	Yak1_heart		Yak2_heart		Yak1_lung		Yak2_lung		Yak3_lung		Cattle1_heart		Cattle2_heart		Cattle3_heart		Cattle 1_lung		Cattle 2_lung		Cattle 3_lung
	# counts	% of raw	# counts	% of raw	# counts	% of raw	# counts	% of raw	# counts	% of raw	# counts	% of raw	# counts	% of raw	# counts	% of raw	# counts	% of raw	# counts	% of raw	# counts	% of raw
Raw reads	16467138	100	14062981	100	7274684	100	6946178	100	6552935	100	6430948	100	8813435	100	8748567	100	7031026	100	7599974	100	6263057	100
3ADT&length filter	2222593	13.5	1731493	12.31	301910	4.15	269904	3.89	266856	4.07	903457	14.05	1290309	14.64	1235179	14.12	276338	3.93	331944	4.37	342885	5.47
Junk reads	8824	0.05	5129	0.04	3792	0.05	3577	0.05	4132	0.06	2906	0.05	4317	0.05	5313	0.06	3448	0.05	5364	0.07	5041	0.08
Rfam	333157	2.02	282536	2.01	136967	1.88	110812	1.6	132586	2.02	103323	1.61	136223	1.55	152115	1.74	113025	1.61	127915	1.68	139969	2.23
mRNA	94776	0.58	59184	0.42	38275	0.53	38112	0.55	45591	0.7	30287	0.47	47391	0.54	75519	0.86	62457	0.89	59705	0.79	71715	1.15
Repeats	25363	0.15	19960	0.14	7649	0.11	7267	0.1	7635	0.12	8392	0.13	7604	0.09	10257	0.12	10003	0.14	10627	0.14	12739	0.2
rRNA	246601	1.5	213793	1.52	96075	1.32	77579	1.12	99479	1.52	74681	1.16	103224	1.17	110364	1.26	73076	1.04	92390	1.22	98568	1.57
tRNA	46251	0.28	42223	0.3	14757	0.2	10693	0.15	11216	0.17	15440	0.24	16939	0.19	21232	0.24	16017	0.23	11602	0.15	15957	0.25
snoRNA	10788	0.07	8594	0.06	10547	0.14	9042	0.13	10272	0.16	3528	0.05	4710	0.05	5307	0.06	9801	0.14	9464	0.12	9767	0.16
snRNA	5112	0.03	3080	0.02	1839	0.03	2194	0.03	2183	0.03	1276	0.02	1807	0.02	3382	0.04	2704	0.04	2470	0.03	2775	0.04
other Rfam RNA	24405	0.15	14846	0.11	13749	0.19	11304	0.16	9436	0.14	8398	0.13	9543	0.11	11830	0.14	11427	0.16	11989	0.16	12902	0.21
high quality reads	13804309	83.83	11981984	85.2	6794105	93.39	6523869	93.92	6103862	93.15	5389326	83.8	7334311	83.22	7279670	83.21	6576025	93.53	7074511	93.09	5703740	91.07
By counts of sequences	Yak1_heart		Yak2_heart		Yak1_lung		Yak2_lung		Yak3_lung		Cattle1_heart		Cattle2_heart		Cattle3_heart		Cattle 1_lung		Cattle 2_lung		Cattle 3_lung
	unique reads	% of unique reads	unique reads	% of unique reads	unique reads	% of unique reads	unique reads	% of unique reads	unique reads	% of unique reads	unique reads	% of unique reads	unique reads	% of unique reads	unique reads	% of unique reads	unique reads	% of unique reads	unique reads	% of unique reads	unique reads	% of unique reads
Raw reads	598054	100	452907	100	322288	100	317402	100	375821	100	323725	100	290204	100	400035	100	301690	100	307585	100	328388	100
3ADT&length filter	359266	60.07	274112	60.52	176329	54.71	178925	56.37	186427	49.61	194204	59.99	157622	54.31	227274	56.81	150044	49.73	165220	53.72	165924	50.53
Junk reads	3299	0.55	1979	0.44	1438	0.45	1332	0.42	1696	0.45	1387	0.43	1747	0.6	2189	0.55	1159	0.38	1614	0.52	1687	0.51
Rfam	27703	4.63	21922	4.84	14013	4.35	13755	4.33	15040	4	18008	5.56	14420	4.97	17347	4.34	16477	5.46	14248	4.63	18944	5.77
mRNA	38118	6.37	21323	4.71	14327	4.45	13343	4.2	15762	4.19	16048	4.96	23499	8.1	44031	11.01	18847	6.25	18344	5.96	22322	6.8
Repeats	3604	0.6	2473	0.55	1930	0.6	1942	0.61	2135	0.57	1627	0.5	1728	0.6	2439	0.61	2410	0.8	2416	0.79	2865	0.87
rRNA	12625	0.08	9626	0.07	5378	0.07	5647	0.08	6277	0.1	8776	0.14	6622	0.08	7562	0.09	6740	0.1	5577	0.07	7986	0.13
tRNA	7161	0.04	6276	0.04	3377	0.05	3020	0.04	3189	0.05	5028	0.08	3508	0.04	4528	0.05	3819	0.05	3014	0.04	4386	0.07
snoRNA	2603	0.02	2266	0.02	2255	0.03	2087	0.03	2417	0.04	1305	0.02	1435	0.02	1739	0.02	2329	0.03	2383	0.03	2471	0.04
snRNA	1165	0.01	785	0.01	743	0.01	750	0.01	889	0.01	568	0.01	575	0.01	757	0.01	977	0.01	810	0.01	1136	0.02
other Rfam RNA	4149	0.03	2969	0.02	2260	0.03	2251	0.03	2268	0.03	2331	0.04	2280	0.03	2761	0.03	2612	0.04	2464	0.03	2965	0.05
high quality reads	169786	28.39	133576	29.49	116213	36.06	110114	34.69	157014	41.78	94190	29.1	93078	32.07	109531	27.38	115363	38.24	108325	35.22	119837	36.49
