# Supplementary material for: Comparative analysis of the microRNA transcriptome between yak and cattle provides insight into high-altitude adaptation
Source: PeerJ. 2017 Nov 2;5:e3959. doi: 10.7717/peerj.3959 (PMC5671665; doi:10.7717/peerj.3959)
Supplement: Table S2 [file peerj-05-3959-s007.xlsx]

## Sheet: Table S2
Table S2. Expression level of differentially expressed miRNAs in heart between yak and cattle
miR name	cattle1_heart (normalized)	cattle2_heart (normalized)	cattle3_heart (normalized)	yak1_heart (normalized)	yak2_heart (normalized)	log2(fold change (Yak/Cattle))	p value	FDR
bta-miR-122-5p	255.328	264.369	1000.51	100.321	27.5191	-2.99163	2.08206e-06	0.000247766
bta-miR-128-1-5p	0.310996	1.47502	1.25735	7.04433	7.96417	2.85597	0.000435159	0.0129034
bta-miR-128-3p	132.64	145.403	157.569	1149.47	953.212	2.82775	3.73622e-31	2.66766e-28
bta-miR-146b-5p	30.8664	30.4649	52.18	63.6723	91.8369	1.00298	0.0017748	0.0396003
bta-miR-181a-2-3p	21.7697	23.6003	32.6911	81.1313	54.6115	1.35975	3.22568e-05	0.00209376
bta-miR-192-5p	445.424	854.775	1386.97	311.378	316.505	-1.54014	7.59968e-05	0.00361745
bta-miR-194-1-5p&bta-miR-206-3p	32.1104	57.072	72.3547	23.7746	17.8127	-1.39636	0.000440813	0.0129034
bta-miR-200a-3p	12.5176	51.4555	68.4112	6.52815	6.32867	-2.8054	1.24229e-05	0.000985546
bta-miR-200b-3p	5.28693	27.1177	37.3775	3.94726	1.91993	-3.00061	8.5777e-05	0.0038278
bta-miR-208a-3p	67.7972	27.9119	42.7499	25.2624	9.38635	-1.43236	0.00196608	0.0425387
bta-miR-215-5p	21.8475	29.4437	31.7766	2.76308	2.98656	-3.30012	4.88985e-10	1.16378e-07
bta-miR-218-5p	95.7868	253.931	235.181	32.6104	51.3049	-2.2533	2.78366e-07	4.96883e-05
bta-miR-2284z-6-3p&bta-miR-2284aa-3-3p	0.544243	5.20147	6.68681	30.3483	32.1537	2.8889	3.72637e-11	1.33031e-08
bta-miR-2285e-2-5p	4.46625	4.02406	6.22568	23.3009	18.6106	2.06862	4.14288e-06	0.000422574
bta-miR-2285o-3p	0.155498	0.262046	0.297192	8.16769	4.67421	4.73171	0.00011945	0.00448879
bta-miR-2285t-3p	2.6953	7.3978	6.85827	24.6582	17.565	1.87877	1.92486e-05	0.00137435
bta-miR-2285t-5p	4.00408	7.96133	9.47139	26.2185	21.6309	1.71815	3.58128e-05	0.00213086
bta-miR-2285x-3p	5.28693	15.4215	13.2458	0.25809	4.96091	-2.17992	0.00160602	0.0369903
bta-miR-2419-5p	23.7912	80.6723	92.2437	158.315	194.838	1.39809	0.000637224	0.016851
bta-miR-2443-5p	1.71048	1.58848	1.94318	16.6392	10.5952	2.93811	6.6615e-07	9.51262e-05
bta-miR-32-3p	9.17439	16.4522	16.5741	2.06472	1.70661	-2.92544	1.00539e-05	0.000897309
bta-miR-326-3p	44.9389	80.7858	85.8426	28.8453	25.0303	-1.4156	0.000113222	0.00448879
bta-miR-429-3p	2.02147	8.39627	11.0875	0.60727	0.924413	-3.25871	0.000462002	0.0129034
bta-miR-6523-5p	2.17697	15.0906	12.4592	0.242908	0.426652	-4.91374	9.16373e-05	0.00384877
bta-miR-6524-3p	7.15291	7.14818	10.2874	0.546543	0.284435	-4.3209	6.37412e-05	0.0032508
bta-miR-708-3p	114.136	62.8586	66.1823	10.2629	35.341	-1.88521	5.44566e-05	0.00299093
bta-miR-708-5p	87.7009	68.5317	63.3247	17.8537	41.4564	-1.3519	0.000469873	0.0129034
bta-miR-767-5p	8.2414	5.78662	4.68648	0.546543	0.639978	-3.43179	0.00105903	0.0260742
bta-miR-885-5p	7.15291	4.87891	9.83018	0.789451	0.639978	-3.3799	0.000261702	0.00889787
